# Supplementary material for: Be Prepared! How Pre-lab Modules Affect Students’ Understanding of Gene Mapping
Source: Springer Nature journal article supplement (doi:10.1007/s10956-020-09890-0), 2020-12-18
Supplement: MOESM1 [file 18701258]

**Online Resource 1** – links to pre-lab Modules (in Dutch)

Introductie Gene mapping  
**Gene Mapping**

# Introductie Gene Mapping

Inhoud: M.E. Haagsman Msc



[cpio@uu.nl](mailto:cpio@uu.nl)



4% COMPLETEET 1 / 23

[https://xerte.uu.nl/play.php?template\\_id=1043](https://xerte.uu.nl/play.php?template_id=1043)

Casus 1: Gene mapping  
**Gene Mapping**

# Casus 1: Gene Mapping

Inhoud: M.E. Haagsman Msc



[cpio@uu.nl](mailto:cpio@uu.nl)



1 / 58

[https://xerte.uu.nl/play.php?template\\_id=1042](https://xerte.uu.nl/play.php?template_id=1042)
