# Supplementary material for: Be Prepared! How Pre-lab Modules Affect Students’ Understanding of Gene Mapping
Source: Springer Nature journal article supplement (doi:10.1007/s10956-020-09890-0), 2020-12-18
Supplement: MOESM3 [file 18701258]

### Online Resource 3 - Rubric for assessing understanding from labreports

| Rubric category     | Insufficient                                                                | Sufficient                                                                                                                                                                                                                                                  | Excellent                                                                                                                                                                                                                                         |
|---------------------|-----------------------------------------------------------------------------|-------------------------------------------------------------------------------------------------------------------------------------------------------------------------------------------------------------------------------------------------------------|---------------------------------------------------------------------------------------------------------------------------------------------------------------------------------------------------------------------------------------------------|
| <b>Introduction</b> | The research goal of the experiment is not provided.                        | The research goal of the experiment is not described in own words and/or an explanation on gene mapping is absent.                                                                                                                                          | The introduction is described in own words and contains an explanation on gene mapping.                                                                                                                                                           |
| <b>Methods</b>      | The Methods section is absent.                                              | The method section refers to the lab protocol but does not contain any adjustments from the protocol and/or descriptions of the specific content of the mastermix.                                                                                          | Adjustments from the protocol and the specific content of the mastermix are provided.                                                                                                                                                             |
| <b>Results</b>      | The results are absent or only contain pictures of the gel electrophoresis. | One or more of the following results are absent: <ul style="list-style-type: none"> <li>– Phenotypic description on the mutants</li> <li>– Genotypic description of own samples</li> <li>– Genotypic description on samples from fellow students</li> </ul> | The results contain the following: <ul style="list-style-type: none"> <li>– Phenotypic description on the mutants</li> <li>– Genotypic description of own samples</li> <li>– Genotypic description on the samples from fellow students</li> </ul> |
| <b>Conclusions</b>  | The conclusion is absent or does not refer to the research goal.            | The conclusion refers to the research goal but an explanation on the calculation of the recombination frequency is absent.                                                                                                                                  | The calculation of the recombination frequency is given and used to explain the most likely location of the gene of interest.                                                                                                                     |
| <b>Discussion</b>   | The discussion is absent or does not discuss any limitations.               | Limitations such as the sample size and efficiency of PCR/gel electrophoresis are discussed.                                                                                                                                                                | Limitations are discussed and suggestions are made to use new markers for a more precise approximation of the exact location of the gene of interest.                                                                                             |
