# Supplementary material for: Be Prepared! How Pre-lab Modules Affect Students’ Understanding of Gene Mapping
Source: Springer Nature journal article supplement (doi:10.1007/s10956-020-09890-0), 2020-12-18
Supplement: MOESM5 [file 18701258]

**Online Resource 5** – Descriptive statistics from pre-lab test scores for students that did or did not read the lab manual

**Supplemental Material 5** *Descriptive statistics of pre-lab test scores for students that did or did not prepare with a pre-lab module and claimed to read or not read the lab manual before the lab activity.*

|                        | Read lab manual | N        | Mean | S.D  |
|------------------------|-----------------|----------|------|------|
| Without Pre-lab module | Yes             | 7 (8%)   | 5.14 | 1.57 |
|                        | No              | 48 (58%) | 5.06 | 1.64 |
|                        | Not determined  | 28 (34%) | 5.43 | 1.43 |
| With Pre-lab module    | Yes             | 31 (27%) | 6.13 | 1.12 |
|                        | No              | 24 (21%) | 5.75 | 1.26 |
|                        | Not determined  | 61 (53%) | 7.02 | 1.54 |

*Mean test scores are only shown for students that did or did not read the lab manual. The test was performed at the start of the mapping experiment. Students received scores from 0 (lowest) to 9 (highest). Pre-lab test scores of students that did not answer whether they read the lab manual are presented as 'not determined'.*
