# Supplementary material for: Be Prepared! How Pre-lab Modules Affect Students’ Understanding of Gene Mapping
Source: Springer Nature journal article supplement (doi:10.1007/s10956-020-09890-0), 2020-12-18
Supplement: MOESM6 [file 18701258]

## Online Resource 6 – Hierarchical Regression Results of pre-lab test scores

**Supplemental Material 6** Hierarchical Regression results of pre-lab test scores for students that did or did not prepare with a pre-lab module and claimed to attend or not attend the lecture before the lab activity.

| Variable             | B     | 95% CI for B |      | SE B | $\beta$ | R <sup>2</sup> | $\Delta R^2$ |
|----------------------|-------|--------------|------|------|---------|----------------|--------------|
|                      |       | LL           | UL   |      |         |                |              |
| Step 1               |       |              |      |      |         | 0.09           | 0.09**       |
| Constant             | 5.08  | 4.69         | 5.45 | 0.19 |         |                |              |
| Contr. vs Exp. Group | 0.87  | 0.33         | 1.41 | 0.27 | 0.30**  |                |              |
| Step 2               |       |              |      |      |         | 0.10           | 0.01         |
| Constant             | 5.16  | 3.36         | 6.96 | 0.91 |         |                |              |
| Contr. Vs Exp. Group | 0.78  | 0.17         | 1.39 | 0.31 | 0.26*   |                |              |
| Read manual          | -0.23 | -0.88        | 0.43 | 0.33 | -0.07   |                |              |
| Attend lecture       | 0.20  | -0.42        | 0.81 | 0.31 | 0.06    |                |              |

Note. CI = confidence interval; LL= lower limit, UL = upper limit; Contr Group = control group; Exp Group = experimental group  
 \*p<0.05 \*\*p<0.01 \*\*\*p<0.001
