# Supplementary material for: Be Prepared! How Pre-lab Modules Affect Students’ Understanding of Gene Mapping
Source: Springer Nature journal article supplement (doi:10.1007/s10956-020-09890-0), 2020-12-18
Supplement: MOESM7 [file 18701258]

## Online Resource 7 – Descriptive statistics on attending the lecture

**Supplemental Material 7** *Descriptive statistics of pre-lab test scores for students that did or did not prepare with a pre-lab module and did or did not stated to attend or not attend the lecture before the lab activity.*

|                        | Attend lecture | N        | Mean | S.D  |
|------------------------|----------------|----------|------|------|
| Without Pre-lab module | Yes            | 15 (18%) | 4.60 | 1.88 |
|                        | No             | 46 (55%) | 5.24 | 1.42 |
|                        | Not determined | 22 (27%) | 5.50 | 1.57 |
| With Pre-lab module    | Yes            | 17 (15%) | 6.18 | 1.29 |
|                        | No             | 60 (52%) | 6.42 | 1.49 |
|                        | Not determined | 39 (34%) | 6.82 | 1.52 |

*Mean test scores are only shown for students that did or did not attend the lecture. The test was performed at the start of the mapping experiment. Students received scores from 0 (lowest) to 9 (highest). One group of students could not attend the lecture because their lecture was scheduled after the pre-lab test and their test scores are presented together with other students that stated not to have attended the lecture. Pre-lab test scores from students that did not answer whether they attended the lecture are presented as 'not determined'.*
